# Supplementary material
Source: PubMed Central journal article supplement (PMC8687734)
Supplement: NIHMS1556930-supplement-1.pdf [file NIHMS1556930-supplement-1.pdf]

**Table S1.** Pediatric Sleep Practices Item History

| <b>Variable ID</b> | <b>Facet</b>     | <b>Original version</b>                               | <b>Decision and rationale</b>                                                                                                                                          | <b>Final version</b>                                                |
|--------------------|------------------|-------------------------------------------------------|------------------------------------------------------------------------------------------------------------------------------------------------------------------------|---------------------------------------------------------------------|
| sp001c             | Timing           | What time do you go to bed on school nights?          | Removed: children reported getting into bed without intent to fall asleep (e.g., read, watch TV, etc.)                                                                 |                                                                     |
| sp002c             | Timing           | What time do you try to fall asleep on school nights? | Revised: replaced "school nights" with "weekday nights" to include nights children are not in school                                                                   | What time do you go to bed on weekday nights?                       |
| sp003c             | Timing           | What time do you wake up on school days?              | Revised: replaced "school days" with "weekdays" to include days children are not in school                                                                             | What time do you wake up on weekdays?                               |
| sp004c             | Timing           | What time do you go to bed on weekends or holidays?   | Revised: removed "holidays" and changed "go to bed" to "try to fall asleep" because children reported getting into bed without intent to fall asleep                   | What time do you try to fall asleep on weekends?                    |
| sp005c             | Timing           | What time do you wake up on weekends or holidays?     | Revised: removed "holidays"                                                                                                                                            | What time do you wake up on weekends?                               |
| sp006c             | Timing           | I went to bed at about the same time every night.     | Retained                                                                                                                                                               | I went to bed at about the same time every night                    |
| sp007c             | Timing           | I woke up at about the same time every morning        | Retained                                                                                                                                                               | I woke up at about the same time every morning                      |
| sp008c             | Room Environment | I fell asleep with a TV show or video on              | Removed: encompassed by sp025c (I watched TV shows or videos just before going to sleep)                                                                               |                                                                     |
| sp009c             | Room Environment | I fell asleep with music on                           | Removed: interpreted as both loud music played by others in the home and soft music played by child to facilitate relaxation                                           |                                                                     |
| sp010c             | Room Environment | I fell asleep with a bright light on.                 | Revised: interpretation of "bright light" varied; some children described dim nightlight. Item revised to convey that exposure to light interfered with sleep quality. | I had problems sleeping because there was too much light in my room |
| sp011c             | Room Environment | I fell asleep in a dark room                          | Removed: intended concept better measured by retained item sp010c (I had problems sleeping because there was too much light in my room)                                |                                                                     |

|        |                   |                                                                     |                                                                                                                        |                                                                     |
|--------|-------------------|---------------------------------------------------------------------|------------------------------------------------------------------------------------------------------------------------|---------------------------------------------------------------------|
| sp012c | Room Environment  | I fell asleep in a quiet room.                                      | Revised: Item revised to convey that noise interfered with sleep quality.                                              | I had problems sleeping because my room was too noisy               |
| sp013c | Room Environment  | I fell asleep in a hot room                                         | Revised: Item revised to convey that temperature interfered with sleep quality                                         | I had problems sleeping because my room was too hot                 |
| sp014c | Room Environment  | I fell asleep in a cool room                                        | Revised: Item revised to convey that temperature interfered with sleep quality                                         | I had problems sleeping because my room was too cold                |
| sp015c | Diet/Caffeine     | I drank beverages with caffeine at dinner or later                  | Removed: not well understood that caffeine could include soda, coffee, tea, etc.                                       |                                                                     |
| sp016c | Diet/Caffeine     | I went to bed feeling hungry                                        | Removed: children reported that this only occurred if parents' did not allow them to have a snack before bedtime       |                                                                     |
| sp017c | Diet/Caffeine     | I had a snack before bed                                            | Removed: children did not identify this as related to their sleep                                                      |                                                                     |
| sp018c | Parental Presence | I fell asleep by myself                                             | Revised: Item revised to convey need for presence of someone else in order to fall asleep                              | I needed someone with me to fall asleep                             |
| sp019c | Parental Presence | I slept with someone else                                           | Removed: interpreted as sharing room with a sibling or other family member instead of negative sleep onset association |                                                                     |
| sp020c | Parental Presence | I slept in the same place every night                               | Removed: failed to capture concept of falling asleep in one location and waking up in another                          |                                                                     |
| sp021c | Parental Presence | I went to sleep and woke up in different places                     | Removed: children interpreted as changing positions, falling asleep in the car, or sleepwalking                        |                                                                     |
| sp022c | Parental Presence | I needed someone else with me to sleep                              | Removed: redundant with sp018c (I needed someone with me to fall asleep)                                               |                                                                     |
| sp023c | Technology        | I texted just before going to sleep                                 | Removed: redundant with sp024c (I used a computer, tablet, or smartphone just before going to sleep)                   |                                                                     |
| sp024c | Technology        | I used a computer, tablet, or smartphone just before going to sleep | Retained                                                                                                               | I used a computer, tablet, or smartphone just before going to sleep |

|        |                     |                                                                      |                                                                                                                              |                                                             |
|--------|---------------------|----------------------------------------------------------------------|------------------------------------------------------------------------------------------------------------------------------|-------------------------------------------------------------|
| sp025c | Technology          | I watched TV or videos just before going to sleep                    | Retained                                                                                                                     | I watched TV or videos just before going to sleep           |
| sp026c | Technology          | I played video or computer games just before going to sleep          | Retained                                                                                                                     | I played video or computer games just before going to sleep |
| sp027c | Technology          | I used a computer, tablet, or smartphone in the middle of the night. | Removed: variable interpretations, including both use of device after nighttime waking and staying up late to use the device |                                                             |
| sp028c | Routine/Consistency | I followed a bedtime routine before falling asleep                   | Retained                                                                                                                     | I followed a bedtime routine before falling asleep          |
| sp029c | Routine/Consistency | I did the same things every night to get ready for bed.              | Removed: item redundant with sp028c (I followed a bedtime routine before falling asleep)                                     |                                                             |
| sp030c | Routine/Consistency | My parent told me what time to go to bed.                            | Removed: failed to adequately capture concept of bedtime routine/consistency                                                 |                                                             |
| sp031c | Routine/Consistency | I took a bath or shower in the hour before bed                       | Removed: failed to adequately capture concept of bedtime routine                                                             |                                                             |
| sp032c | Routine/Consistency | I read in the hour before bed                                        | Removed: failed to adequately capture concept of bedtime routine                                                             |                                                             |

**Figure S1.** Sleep Disturbance and Sleep Related Impairment T-scores by Sleep Practice item responses

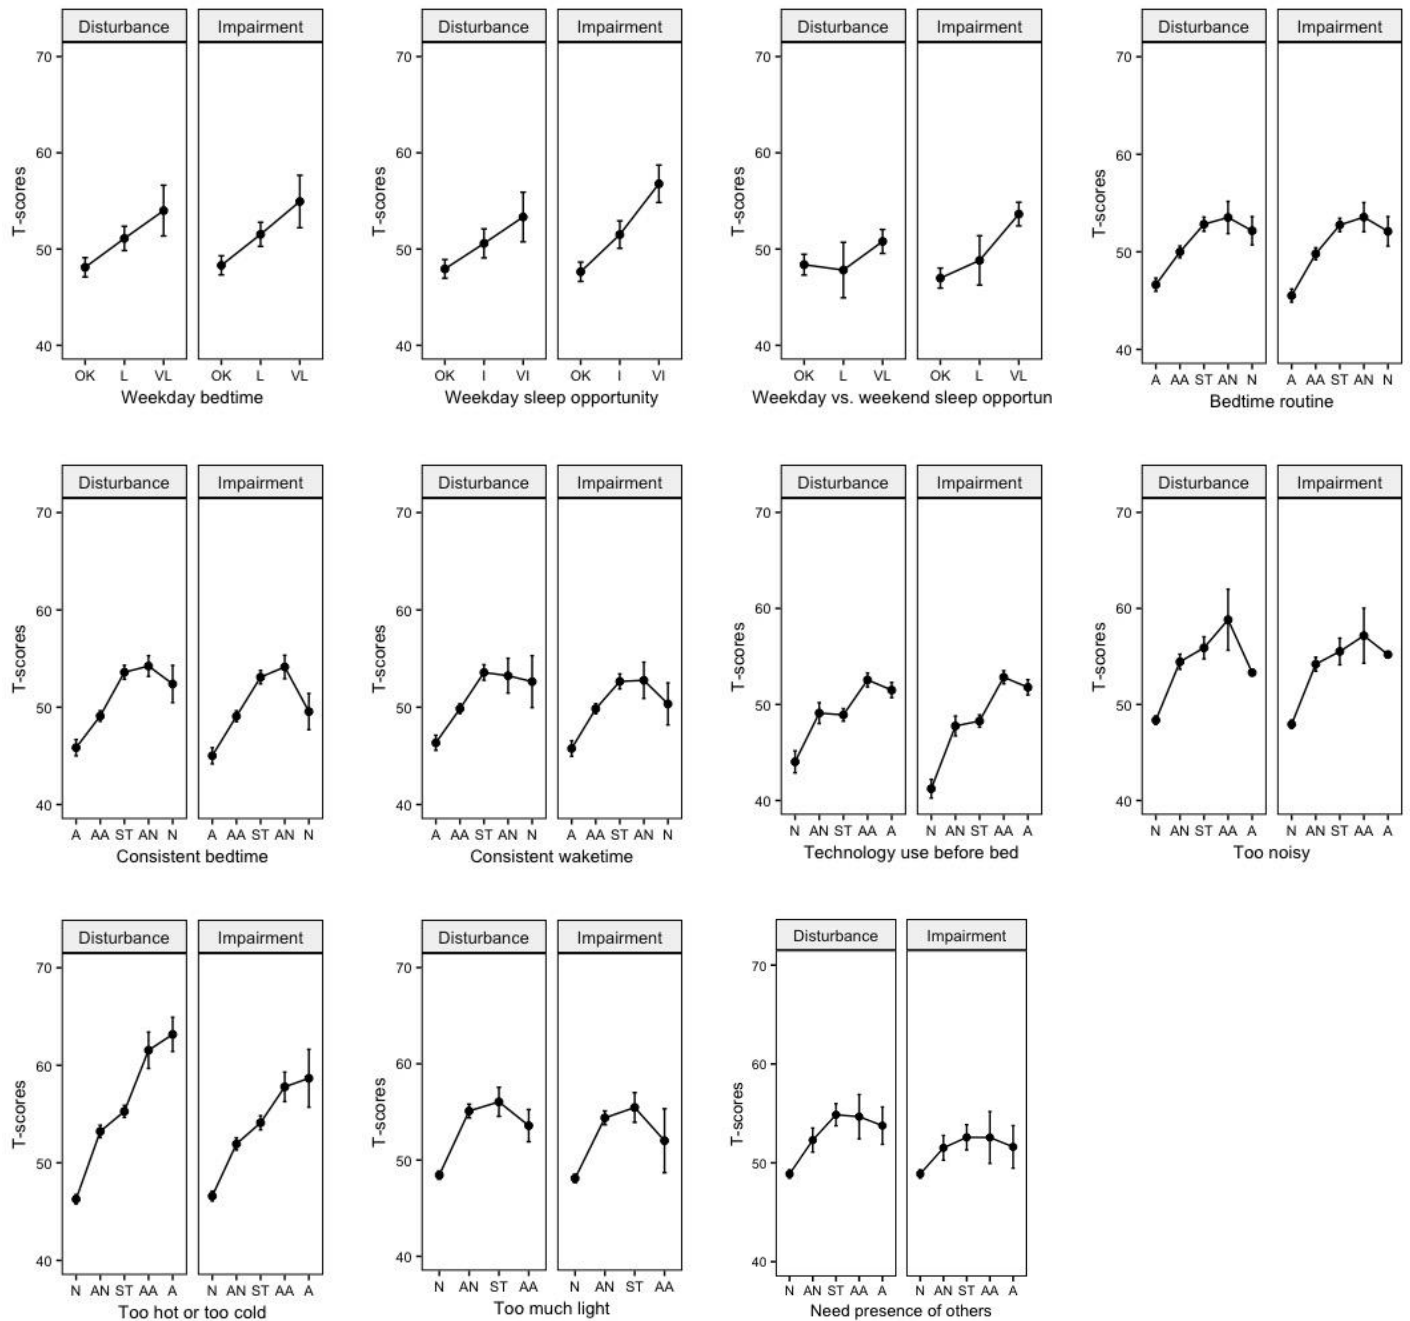

**Notes:** L = Late, VL = Very Late, I = Insufficient; VI = Very Insufficient, N = Never, AN = Almost Never, ST = Sometimes, AA = Almost Always, A = Always

**ONLINE SUPPLEMENT APPENDIX A  
SLEEP PRACTICE SCORING INSTRUCTIONS**

**Step 1: Item recodes**

Recode each variable as indicated in the “Recoded response categories” column below:

| Variable ID                     | Item                                                   | Original response categories                                                                                                                                                                                                                                                                                           | Recoded response categories                                                                                                                                                                                                                                                                                                                                                                            |
|---------------------------------|--------------------------------------------------------|------------------------------------------------------------------------------------------------------------------------------------------------------------------------------------------------------------------------------------------------------------------------------------------------------------------------|--------------------------------------------------------------------------------------------------------------------------------------------------------------------------------------------------------------------------------------------------------------------------------------------------------------------------------------------------------------------------------------------------------|
| sp002c<br>(weekday<br>bedtime)  | What time do you try to fall asleep on weekday nights? | 1. Before 7:00PM<br>2. 7:00PM-7:29PM<br>3. 7:30PM-7:59PM<br>4. 8:00PM-8:29PM<br>5. 8:30PM-8:59PM<br>6. 9:00PM-9:29PM<br>7. 9:30PM-9:59PM<br>8. 10:00PM-10:29PM<br>9. 10:30PM-10:59PM<br>10. 11:00PM-11:29PM<br>11. 11:30PM-11:59PM<br>12. After midnight                                                               | 1. Before 7:00PM → 18.5<br>2. 7:00PM-7:29PM → 19<br>3. 7:30PM-7:59PM → 19.5<br>4. 8:00PM-8:29PM → 20<br>5. 8:30PM-8:59PM → 20.5<br>6. 9:00PM-9:29PM → 21<br>7. 9:30PM-9:59PM → 21.5<br>8. 10:00PM-10:29PM → 22<br>9. 10:30PM-10:59PM → 22.5<br>10. 11:00PM-11:29PM → 23<br>11. 11:30PM-11:59PM → 23.5<br>12. After midnight → 24                                                                       |
| sp003c<br>(weekday<br>waketime) | What time do you wake up on weekdays?                  | 1. Before 5:00AM<br>2. 5:00AM-5:29AM<br>3. 5:30AM-5:59AM<br>4. 6:00AM-6:29AM<br>5. 6:30AM-6:59AM<br>6. 7:00AM-7:29AM<br>7. 7:30AM-7:59AM<br>8. 8:00AM-8:29AM<br>9. 8:30AM-8:59AM<br>10. 9:00AM-9:29AM<br>11. 9:30AM-9:59AM<br>12. 10:00AM-10:29AM<br>13. 10:30AM-10:59AM<br>14. 11:00AM-11:29AM<br>15. 11:30AM-11:59AM | 1. Before 5:00AM → 4.5<br>2. 5:00AM-5:29AM → 5<br>3. 5:30AM-5:59AM → 5.5<br>4. 6:00AM-6:29AM → 6<br>5. 6:30AM-6:59AM → 6.5<br>6. 7:00AM-7:29AM → 7<br>7. 7:30AM-7:59AM → 7.5<br>8. 8:00AM-8:29AM → 8<br>9. 8:30AM-8:59AM → 8.5<br>10. 9:00AM-9:29AM → 9<br>11. 9:30AM-9:59AM → 9.5<br>12. 10:00AM-10:29AM → 10<br>13. 10:30AM-10:59AM → 10.5<br>14. 11:00AM-11:29AM → 11<br>15. 11:30AM-11:59AM → 11.5 |
| sp004c                          | What time do you try to fall asleep on weekends?       | 1. Before 7:00PM<br>2. 7:00PM-7:29PM<br>3. 7:30PM-7:59PM<br>4. 8:00PM-8:29PM<br>5. 8:30PM-8:59PM<br>6. 9:00PM-9:29PM<br>7. 9:30PM-9:59PM<br>8. 10:00PM-10:29PM<br>9. 10:30PM-10:59PM<br>10. 11:00PM-11:29PM<br>11. 11:30PM-11:59PM<br>12. After midnight                                                               | 1. Before 7:00PM → 18.5<br>2. 7:00PM-7:29PM → 19<br>3. 7:30PM-7:59PM → 19.5<br>4. 8:00PM-8:29PM → 20<br>5. 8:30PM-8:59PM → 20.5<br>6. 9:00PM-9:29PM → 21<br>7. 9:30PM-9:59PM → 21.5<br>8. 10:00PM-10:29PM → 22<br>9. 10:30PM-10:59PM → 22.5<br>10. 11:00PM-11:29PM → 23<br>11. 11:30PM-11:59PM → 23.5<br>12. After midnight → 24                                                                       |

|                                  |                                                                                   |                                                                                                                                                                                                                                                                                                                                                                                                                                                              |                                                                                                                                                                                                                                                                                                                                                                                                                                                                                                                                              |
|----------------------------------|-----------------------------------------------------------------------------------|--------------------------------------------------------------------------------------------------------------------------------------------------------------------------------------------------------------------------------------------------------------------------------------------------------------------------------------------------------------------------------------------------------------------------------------------------------------|----------------------------------------------------------------------------------------------------------------------------------------------------------------------------------------------------------------------------------------------------------------------------------------------------------------------------------------------------------------------------------------------------------------------------------------------------------------------------------------------------------------------------------------------|
| sp005c                           | What time do you wake up on weekends?                                             | <ol style="list-style-type: none"> <li>1. Before 5:00AM</li> <li>2. 5:00AM-5:29AM</li> <li>3. 5:30AM-5:59AM</li> <li>4. 6:00AM-6:29AM</li> <li>5. 6:30AM-6:59AM</li> <li>6. 7:00AM-7:29AM</li> <li>7. 7:30AM-7:59AM</li> <li>8. 8:00AM-8:29AM</li> <li>9. 8:30AM-8:59AM</li> <li>10. 9:00AM-9:29AM</li> <li>11. 9:30AM-9:59AM</li> <li>12. 10:00AM-10:29AM</li> <li>13. 10:30AM-10:59AM</li> <li>14. 11:00AM-11:29AM</li> <li>15. 11:30AM-11:59AM</li> </ol> | <ol style="list-style-type: none"> <li>1. Before 5:00AM → 4.5</li> <li>2. 5:00AM-5:29AM → 5</li> <li>3. 5:30AM-5:59AM → 5.5</li> <li>4. 6:00AM-6:29AM → 6</li> <li>5. 6:30AM-6:59AM → 6.5</li> <li>6. 7:00AM-7:29AM → 7</li> <li>7. 7:30AM-7:59AM → 7.5</li> <li>8. 8:00AM-8:29AM → 8</li> <li>9. 8:30AM-8:59AM → 8.5</li> <li>10. 9:00AM-9:29AM → 9</li> <li>11. 9:30AM-9:59AM → 9.5</li> <li>12. 10:00AM-10:29AM → 10</li> <li>13. 10:30AM-10:59AM → 10.5</li> <li>14. 11:00AM-11:29AM → 11</li> <li>15. 11:30AM-11:59AM → 11.5</li> </ol> |
| sp028c<br>(bedtime routine)      | I followed a bedtime routine before falling asleep.                               | <ol style="list-style-type: none"> <li>1. Never</li> <li>2. Almost never</li> <li>3. Sometimes</li> <li>4. Almost always</li> <li>5. Always</li> </ol>                                                                                                                                                                                                                                                                                                       | <ol style="list-style-type: none"> <li>1. Never → 2</li> <li>2. Almost never → 2</li> <li>3. Sometimes → 2</li> <li>4. Almost always → 1</li> <li>5. Always → 0</li> </ol>                                                                                                                                                                                                                                                                                                                                                                   |
| sp006c<br>(bedtime consistency)  | I tried to fall asleep at about the same time every night.                        | <ol style="list-style-type: none"> <li>1. Never</li> <li>2. Almost never</li> <li>3. Sometimes</li> <li>4. Almost always</li> <li>5. Always</li> </ol>                                                                                                                                                                                                                                                                                                       | <ol style="list-style-type: none"> <li>1. Never → 2</li> <li>2. Almost never → 2</li> <li>3. Sometimes → 2</li> <li>4. Almost always → 1</li> <li>5. Always → 0</li> </ol>                                                                                                                                                                                                                                                                                                                                                                   |
| sp007c<br>(waketime consistency) | I woke up at about the same time every morning.                                   | <ol style="list-style-type: none"> <li>1. Never</li> <li>2. Almost never</li> <li>3. Sometimes</li> <li>4. Almost always</li> <li>5. Always</li> </ol>                                                                                                                                                                                                                                                                                                       | <ol style="list-style-type: none"> <li>1. Never → 2</li> <li>2. Almost never → 2</li> <li>3. Sometimes → 2</li> <li>4. Almost always → 1</li> <li>5. Always → 0</li> </ol>                                                                                                                                                                                                                                                                                                                                                                   |
| sp025c<br>(TV)                   | I watched TV shows or videos just before falling asleep.                          | <ol style="list-style-type: none"> <li>1. Never</li> <li>2. Almost never</li> <li>3. Sometimes</li> <li>4. Almost always</li> <li>5. Always</li> </ol>                                                                                                                                                                                                                                                                                                       | <p>Consider sp025c (TV), sp026c (games), and sp024c (phone). For each respondent, identify the item with the <i>highest</i> response category endorsement.</p> <p>Recode that response as follows:</p> <ol style="list-style-type: none"> <li>1. Never → 0</li> <li>2. Almost never → 1</li> <li>3. Sometimes → 1</li> <li>4. Almost always → 2</li> <li>5. Always → 2</li> </ol> <p>Call this variable “tech”</p>                                                                                                                           |
| sp026c<br>(games)                | I played video or computer games just before falling asleep.                      | <ol style="list-style-type: none"> <li>1. Never</li> <li>2. Almost never</li> <li>3. Sometimes</li> <li>4. Almost always</li> <li>5. Always</li> </ol>                                                                                                                                                                                                                                                                                                       |                                                                                                                                                                                                                                                                                                                                                                                                                                                                                                                                              |
| sp024c<br>(phone)                | I used my phone, computer, or other electronic device just before falling asleep. | <ol style="list-style-type: none"> <li>1. Never</li> <li>2. Almost never</li> <li>3. Sometimes</li> <li>4. Almost always</li> <li>5. Always</li> </ol>                                                                                                                                                                                                                                                                                                       |                                                                                                                                                                                                                                                                                                                                                                                                                                                                                                                                              |
| sp018c<br>(presence)             | I needed someone with me to fall asleep                                           | <ol style="list-style-type: none"> <li>1. Never</li> <li>2. Almost never</li> <li>3. Sometimes</li> <li>4. Almost always</li> <li>5. Always</li> </ol>                                                                                                                                                                                                                                                                                                       | <ol style="list-style-type: none"> <li>1. Never → 0</li> <li>2. Almost never → 1</li> <li>3. Sometimes → 2</li> <li>4. Almost always → 2</li> <li>5. Always → 2</li> </ol>                                                                                                                                                                                                                                                                                                                                                                   |

|                      |                                                                      |                                                                              |                                                                                                                                                                                                                                                                                                                                         |
|----------------------|----------------------------------------------------------------------|------------------------------------------------------------------------------|-----------------------------------------------------------------------------------------------------------------------------------------------------------------------------------------------------------------------------------------------------------------------------------------------------------------------------------------|
| sp012c<br>(noise)    | I had problems sleeping because my room was too noisy.               | 1. Never<br>2. Almost never<br>3. Sometimes<br>4. Almost always<br>5. Always | 1. Never → 0<br>2. Almost never → 1<br>3. Sometimes → 1<br>4. Almost always → 2<br>5. Always → 2                                                                                                                                                                                                                                        |
| sp010c<br>(light)    | I had problems sleeping because there was too much light in my room. | 1. Never<br>2. Almost never<br>3. Sometimes<br>4. Almost always<br>5. Always | 1. Never → 0<br>2. Almost never → 1<br>3. Sometimes → 1<br>4. Almost always → 2<br>5. Always → 2                                                                                                                                                                                                                                        |
| sp013c<br>(too hot)  | I had problems sleeping because my room was too hot.                 | 1. Never<br>2. Almost never<br>3. Sometimes<br>4. Almost always<br>5. Always | Consider sp013c (too hot) and sp014c (too cold). For each respondent, identify the item with the <i>highest</i> response category endorsement.<br><br>Recode that response as follows:<br>1. Never → 0<br>2. Almost never → 1<br>3. Sometimes → 1<br>4. Almost always → 2<br>5. Always → 2<br><br>Call this recoded variable “roomtemp” |
| sp014c<br>(too cold) | I had problems sleeping because my room was too cold.                | 1. Never<br>2. Almost never<br>3. Sometimes<br>4. Almost always<br>5. Always |                                                                                                                                                                                                                                                                                                                                         |

## Step 2: Generate sleep timing variables

### Weekday and weekend sleep opportunity

Calculate weekday and weekend sleep opportunity using recoded variables as follows:

Weekday sleep opportunity = (24 - weekday bedtime) + weekday wake time

Weekend sleep opportunity = (24 - weekend bedtime) + weekend wake time

Calculate **weekend oversleep** as follows:

Weekend oversleep = weekend sleep opportunity – weekday sleep opportunity

Assign **weekday sleep opportunity** scores and labels depending on children’s age as follows:

| <b><u>For children ages 8-12 years...</u></b> |                                           |
|-----------------------------------------------|-------------------------------------------|
| <b>If weekday sleep opportunity is...</b>     | <b>Assign the following score (label)</b> |
| ≥ 9.5 hours                                   | 0 (Sufficient)                            |
| ≥ 8.5 & < 9.5 hours                           | 1 (Insufficient)                          |
| < 8.5 hours                                   | 2 (Very Insufficient)                     |

| <b><u>For children ages 13-17 years...</u></b> |                                           |
|------------------------------------------------|-------------------------------------------|
| <b>If weekday sleep opportunity is...</b>      | <b>Assign the following score (label)</b> |
| ≥ 8.5 hours                                    | 0 (Sufficient)                            |
| ≥ 7.5 & < 8.5 hours                            | 1 (Insufficient)                          |
| < 7.5 hours                                    | 2 (Very Insufficient)                     |

## **Weekday bedtime**

Assign **weekday bedtime** scores and labels depending on children's age as follows:

| <b>For children ages 8-12 years...</b> |                                           |
|----------------------------------------|-------------------------------------------|
| <b>If weekday bedtime is...</b>        | <b>Assign the following score (label)</b> |
| ≤ 21                                   | 0 (Appropriate)                           |
| > 21 & ≤ 22                            | 1 (Late)                                  |
| > 22                                   | 2 (Very Late)                             |

| <b>For children ages 13-17 years...</b> |                                           |
|-----------------------------------------|-------------------------------------------|
| <b>If weekday bedtime is...</b>         | <b>Assign the following score (label)</b> |
| ≤ 22                                    | 0 (Appropriate)                           |
| > 22 & ≤ 23                             | 1 (Late)                                  |
| > 23                                    | 2 (Very Late)                             |

### **Step 3: Calculate total scores**

*Sleep practices items can be combined to yield 3 scale scores (sleep timing, routines/consistency, and sleep environment. Generate scales scores as follows:*

**Total sleep timing score (possible range 0-4):** Sum scores for “weekday sleep opportunity” and “weekday bedtime”

**Total routines/consistency score (possible range 0-6):** Sum recoded values for sp028c (bedtime routine), sp006c (bedtime consistency), and sp007c (waketime consistency)

**Total sleep environment score (possible range 0-6):** Sum recoded values for sp012c (noise), sp010c (light), and “room temp”

*In addition, “tech” (maximum level of technology use before bed) and “sp018c” (presence: needed someone to fall asleep) can be used as indicator items (possible range in score = 0-2).*

**Bedtime technology indicator item (possible range 0-2):** Use “tech” as an indicator item

**Need someone to fall asleep indicator item (possible range 0-2):** Use sp018c as an indicator item
